# Supplementary material for: Nickel-catalyzed cocyclotrimerization of arynes with diynes; a novel method for synthesis of naphthalene derivatives
Source: Royal Society of Chemistry journal article supplement (doi:10.1039/b415691a), 2005-01-01
Supplement: b415691a.pdf [file b415691a.pdf]

**Supplementary Information**

**Nickel-catalyzed cocyclotrimerization of arynes with diynes; a novel method for synthesis of naphthalene derivatives**

Jen-Chieh Hsieh and Chien-Hong Cheng\*

Department of Chemistry, Tsing Hua University, Hsinchu, 30013 Taiwan

E-mail: chcheng@mx.nthu.edu.tw

**Experimental section**

**General procedure for the [2 + 2 +2] cycloaddition of benzyne with diyne:**

NiBr<sub>2</sub>(dppe) (31 mg, 0.050 mmol), Zn (9.6 mg, 0.15 mmol) and CsF (151 mg, 2.0 mmol) were placed in a screw-capped vial. The vial was sealed with a septum and flushed several times with nitrogen. Benzyne precursor (0.50 mmol), diyne (1.0 mmol), and acetonitrile (2.0 mL) were injected into the reaction mixture via a syringe. The septum was removed, and the vial was sealed with a screw cap quickly under nitrogen. The reaction mixture was stirred at 80 °C for 12 h. The crude reaction mixture was diluted with CH<sub>2</sub>Cl<sub>2</sub>, filtered through a thin Celite pad, and concentrated *in vacuo*. The residue was purified by chromatography on a silica gel column using hexane as the eluent to give the pure product.

Products **3a-p** were obtained according to this procedure. Spectral data for these compounds are listed below.

**1,2,3,4-Tetrahydroanthracene (3a):** white solid, mp: 92-94 °C; IR (KBr): 2900, 832, 719 cm<sup>-1</sup>; <sup>1</sup>H NMR (500 MHz, CDCl<sub>3</sub>): δ 1.85 (quintet, *J* = 10 Hz, 4 H), 2.96 (t, *J* = 7.5 Hz, 4 H), 7.34 (q, *J* = 6.5 Hz, 2 H), 7.52 (s, 2 H), 7.59 (q, *J* = 6.5 Hz, 2 H); <sup>13</sup>C NMR (125 MHz, CDCl<sub>3</sub>): δ 23.4, 29.8, 124.9, 126.6, 126.9, 132.1, 136.2; HRMS: C<sub>14</sub>H<sub>14</sub> calculated 182.1096, found 182.1095.

**2,3-Dihydro-1*H*-cyclopenta[*c*]naphthalene (3b):** white solid, mp: 84-86 °C; IR (KBr): 2955, 741, 702 cm<sup>-1</sup>; <sup>1</sup>H NMR (500 MHz, CDCl<sub>3</sub>): δ 2.13 (quintet, *J* = 10 Hz, 2 H), 3.05 (t, *J* = 7.5 Hz, 4 H), 7.37 (q, *J* = 6.5 Hz, 2 H), 7.65 (s, 2 H), 7.75 (q, *J* = 6.5 Hz, 2 H); <sup>13</sup>C NMR (125 MHz, CDCl<sub>3</sub>): δ 26.2, 32.6, 122.1, 124.8, 127.4, 132.6, 143.4; HRMS: C<sub>13</sub>H<sub>12</sub> calculated 168.0939, found 168.0937.

**7,8,9,10-Tetrahydro-6*H*-cyclohepta[*c*]naphthalene (3c):** white solid, mp: 104-106 °C; IR (KBr): 2924, 946, 887, 831, 744 cm<sup>-1</sup>; <sup>1</sup>H NMR (500 MHz, CDCl<sub>3</sub>): δ 1.68-1.73 (m, 4 H), 1.81-1.86 (m, 2 H), 2.92-2.94 (m, 4 H), 7.36 (q, *J* = 7 Hz, 2 H), 7.53 (s, 2 H), 7.71 (q, *J* = 7 Hz, 2 H); <sup>13</sup>C NMR (125 MHz, CDCl<sub>3</sub>): δ 29.2, 32.4, 36.8, 125.1, 126.7, 127.0, 132.4, 142.2; HRMS: C<sub>15</sub>H<sub>16</sub> calculated 196.1252, found 196.1253.

**1,3-Dihydro{naphtho-[2,3-*c*]}furan (3d):** yellow solid, mp: 153-155 °C; IR (KBr): 2921, 1045 (s, ν<sub>C=O</sub>), 870, 746 cm<sup>-1</sup>; <sup>1</sup>H NMR (500 MHz, CDCl<sub>3</sub>): δ 5.12 (s, 4 H), 7.43 (q, *J* = 6.5 Hz, 2 H), 7.66 (s, 2 H), 7.80 (q, *J* = 6.5 Hz, 2 H); <sup>13</sup>C NMR (125 MHz, CDCl<sub>3</sub>): δ 72.8, 119.2, 125.7, 127.9, 133.1, 138.2; HRMS: C<sub>12</sub>H<sub>10</sub>O calculated 170.0732, found 170.0730.

**1,3-Dihydrocyclopenta[*c*]naphthalene-2,2-dicarboxylic acid dimethyl ester (3e):** yellow solid, mp: 120-122 °C; IR (KBr): 1742 (s, ν<sub>C=O</sub>), 1271, 1252, 1198, 1052, 882, 745 cm<sup>-1</sup>; <sup>1</sup>H NMR (500 MHz, CDCl<sub>3</sub>): δ 3.71 (s, 4 H), 3.74 (s, 6 H), 7.38 (q, *J* = 6.5 Hz, 2 H), 7.63 (s, 2 H), 7.74 (q, *J* = 6.5 Hz, 2 H); <sup>13</sup>C NMR (125 MHz, CDCl<sub>3</sub>): δ 40.2,

# Supplementary Material (ESI) for Chemical Communications  
# This journal is © The Royal Society of Chemistry 2005

53.0, 60.9, 122.5, 125.3, 127.6, 133.1, 138.8, 171.9; HRMS: C<sub>17</sub>H<sub>16</sub>O<sub>4</sub> calculated  
284.1049, found 284.1050.

**1,3-Dihydrocyclopenta[*c*]naphthalene-2,2-dicarbonitrile (3f):** yellow solid, mp:  
161-163 °C; IR (KBr): 2244 (ν<sub>C≡N</sub>), 752, 694 cm<sup>-1</sup>; <sup>1</sup>H NMR (500 MHz, CDCl<sub>3</sub>): δ  
3.84 (s, 4 H), 7.49 (q, *J* = 6 Hz, 2 H), 7.75 (s, 2 H), 7.80 (q, *J* = 6 Hz, 2 H); <sup>13</sup>C NMR  
(125 MHz, CDCl<sub>3</sub>): δ34.3, 44.2, 116.1, 123.8, 126.6, 127.9, 133.4, 134.1; HRMS:  
C<sub>15</sub>H<sub>10</sub>N<sub>2</sub> calculated 218.0844, found 218.0842.

**2-(4-Toluenesulfonyl)-2,3-dihydro-1*H*-benzo[*f*]isoindole (3g):** brown solid, mp:  
285-287 °C ; IR (KBr): 1162 (ν<sub>S=O</sub>), 747, 664 cm<sup>-1</sup>; <sup>1</sup>H NMR (500 MHz, CDCl<sub>3</sub>): δ  
2.39 (s, 3 H), 4.72 (s, 4 H), 7.29 (d, *J* = 8 Hz, 2 H), 7.41 (q, *J* = 6.5 Hz, 2 H), 7.60 (s, 2  
H), 7.74 (q, *J* = 6.5 Hz, 2 H), 7.78 (q, *J* = 8 Hz, 2 H); <sup>13</sup>C NMR (125 MHz, CDCl<sub>3</sub>): δ  
21.5, 53.1, 121.2, 126.1, 127.7, 127.7, 129.8, 133.0, 134.8, 138.8, 143.8; HRMS:  
C<sub>19</sub>H<sub>17</sub>NO<sub>2</sub>S calculated 323.0980, found 323.0983.

**4-Methyl-1,3-dihydronaphtho[2,3-*c*]furan (3h):** yellow oil; IR (KBr): 2918, 1211 (s,  
ν<sub>C-O</sub>), 1040, 755, 698 cm<sup>-1</sup>; <sup>1</sup>H NMR (500 MHz, CDCl<sub>3</sub>): δ2.54 (s, 3 H), 5.23 (s, 2 H),  
5.24 (s, 2 H), 7.40-7.48 (m, 2 H), 7.52 (s, 1 H), 7.79 (d, *J* = 8 Hz, 1 H), 7.97 (d, *J* = 8  
Hz, 1 H); <sup>13</sup>C NMR (125 MHz, CDCl<sub>3</sub>): δ15.4, 72.8, 73.5, 120.5, 122.8, 125.3, 125.5,  
128.5, 131.1, 131.7, 133.4, 137.3, 138.1; HRMS: C<sub>13</sub>H<sub>12</sub>O calculated 184.0888, found  
184.0890.

**4-Phenyl-1,3-dihydronaphtho[2,3-*c*]furan (3i):** brown solid, mp: 122-124 °C; IR  
(KBr): 2925, 1051, 1025 (s, ν<sub>C-O</sub>), 751, 701 cm<sup>-1</sup>; <sup>1</sup>H NMR (500 MHz, CDCl<sub>3</sub>): δ5.00  
(s, 2 H), 5.28 (s, 2 H), 7.31-7.50 (m, 7 H), 7.66 (d, *J* = 8.5 Hz, 1 H), 7.68 (s, 1 H), 7.85  
(d, *J* = 8.5 Hz, 1 H); <sup>13</sup>C NMR (125 MHz, CDCl<sub>3</sub>): δ72.9, 73.4, 118.8, 125.6, 125.7,  
125.7, 127.6, 128.0, 128.6, 129.3, 29.4, 131.8, 133.6, 136.8, 137.6, 138.1; HRMS:  
C<sub>18</sub>H<sub>14</sub>O calculated 246.1045, found 246.1047.

**5,10-Dimethyl-1,2,3,4-tetrahydroanthracene (3j):** colorless oil; IR (KBr): 2929, 838, 781, 697  $\text{cm}^{-1}$ ;  $^1\text{H}$  NMR (500 MHz,  $\text{CDCl}_3$ ):  $\delta$ 1.83-188 (m, 4 H), 2.54 (s, 6 H), 2.79 (t,  $J = 7.5$  Hz, 4 H), 7.40 (q,  $J = 6$  Hz, 2 H), 7.97 (q,  $J = 6$  Hz, 2 H);  $^{13}\text{C}$  NMR (125 MHz,  $\text{CDCl}_3$ ):  $\delta$ 14.0, 23.2, 28.9, 123.1, 124.2, 131.0, 133.6, 137.1; HRMS:  $\text{C}_{16}\text{H}_{18}$  calculated 210.1409, found 210.1411.

**7-Methyl-1,2,3,4-tetrahydroanthracene (3k):** yellow solid, mp: 72-74  $^\circ\text{C}$ ; IR (KBr): 1501, 922, 876, 797  $\text{cm}^{-1}$ ;  $^1\text{H}$  NMR (500 MHz,  $\text{CDCl}_3$ ):  $\delta$ 1.82-185 (m, 4 H), 2.45 (s, 3 H), 2.93 (t,  $J = 7.5$  Hz, 4 H), 7.17 (d,  $J = 8$  Hz, 1 H), 7.42 (s, 1H), 7.45 (s, 1 H), 7.46 (s, 1 H), 7.58 (d,  $J = 8$  Hz, 1 H);  $^{13}\text{C}$  NMR (125 MHz,  $\text{CDCl}_3$ ):  $\delta$ 21.7, 23.4 (2C), 29.7, 29.8, 125.8, 126.0, 126.4, 126.8, 127.2, 130.3, 132.3, 134.3, 135.2, 136.2; HRMS:  $\text{C}_{15}\text{H}_{16}$  calculated 196.1252, found 196.1248.

**6-Methyl-2,3-dihydro-1H-cyclopenta[c]naphthalene (3l):** yellow solid, mp: 102-104  $^\circ\text{C}$ ; IR (KBr): 2921, 880, 797, 747  $\text{cm}^{-1}$ ;  $^1\text{H}$  NMR (500 MHz,  $\text{CDCl}_3$ ):  $\delta$  2.09-2.13 (m, 2 H), 2.46 (s, 3 H), 3.01 (t,  $J = 7.5$  Hz, 4 H), 7.20 (d,  $J = 8$  Hz, 1 H), 7.50 (s, 1 H), 7.54 (s, 1 H), 7.58 (s, 1 H), 7.62 (d,  $J = 8$  Hz, 1 H);  $^{13}\text{C}$  NMR (125 MHz,  $\text{CDCl}_3$ ):  $\delta$ 21.2, 26.2, 32.5, 32.6, 126.0, 126.5, 126.7, 127.1, 127.9, 134.3, 137.0, 137.7, 142.5, 143.4; HRMS:  $\text{C}_{14}\text{H}_{14}$  calculated 182.1096, found 182.1098.

**6-Methyl-1,3-dihydrocyclopenta[b]naphthalene-2,2-dicarboxylic acid dimethyl ester (3m):** yellow solid, mp: 117-119  $^\circ\text{C}$ ; IR (KBr): 1732 (s,  $\nu_{\text{C=O}}$ ), 1248 (s,  $\nu_{\text{C-O}}$ ), 1199, 1150, 1070, 884, 797  $\text{cm}^{-1}$ ;  $^1\text{H}$  NMR (500 MHz,  $\text{CDCl}_3$ ):  $\delta$ 2.46 (s, 3 H), 3.71 (s, 4 H), 3.74 (s, 6 H), 7.21 (d,  $J = 8$  Hz, 1 H), 7.50 (s, 1 H), 7.53 (s, 1 H), 7.57 (s, 1 H), 7.62 (d,  $J = 8$  Hz, 1 H);  $^{13}\text{C}$  NMR (125 MHz,  $\text{CDCl}_3$ ):  $\delta$ 21.6, 40.1, 40.2, 53.0, 60.9, 121.8, 122.2, 126.6, 127.3, 127.6, 131.6, 133.9, 134.9, 137.8, 138.8, 172.0; HRMS:  $\text{C}_{18}\text{H}_{18}\text{O}_4$  calculated 298.1205, found 298.1203.

**7,8-Dimethyl-1,2,3,4-tetrahydroanthracene (3n):** white solid, mp: 125-127  $^\circ\text{C}$ ; IR

# Supplementary Material (ESI) for Chemical Communications  
# This journal is © The Royal Society of Chemistry 2005

(KBr): 2928, 1028, 920, 887  $\text{cm}^{-1}$ ;  $^1\text{H}$  NMR (500 MHz,  $\text{CDCl}_3$ ):  $\delta$ 1.83 (quintet,  $J = 6.5$  Hz, 4 H), 2.36 (s, 6 H), 2.91 (t,  $J = 6.5$  Hz, 4 H), 7.38 (s, 2 H), 7.42 (s, 2 H);  $^{13}\text{C}$  NMR (125 MHz,  $\text{CDCl}_3$ ):  $\delta$ 20.2, 23.5, 29.7, 125.6, 126.4, 131.1, 134.4, 135.1; HRMS:  $\text{C}_{16}\text{H}_{18}$  calculated 210.1409, found 210.1404.

**8,9,10,11-Tetrahydro-benzo[*a*]anthracene (3o):** brown solid, mp: 90-92  $^\circ\text{C}$ ; IR (KBr): 890, 908, 753  $\text{cm}^{-1}$ ;  $^1\text{H}$  NMR (500 MHz,  $\text{CDCl}_3$ ):  $\delta$ 1.87-2.08 (m, 4 H), 2.98 (t,  $J = 10$  Hz, 2 H), 3.06 (t,  $J = 10$  Hz, 2 H), 7.52-7.60 (m, 5 H), 7.82 (d,  $J = 8$  Hz, 1 H), 8.35 (s, 1 H), 8.61 (d,  $J = 8$  Hz, 1 H);  $^{13}\text{C}$  NMR (125 MHz,  $\text{CDCl}_3$ ):  $\delta$ 23.4, 23.4, 29.5, 30.1, 122.4, 122.4, 125.9, 126.0, 126.2 (2C), 126.5, 127.9, 128.4, 128.5, 130.1 (2C), 136.44, 136.6; HRMS:  $\text{C}_{18}\text{H}_{16}$  calculated 232.1252, found 232.1253.

**4-(Phenanthren-9-yl)butyronitrile (3p):** orange solid, mp: 91-93  $^\circ\text{C}$ ; IR (KBr): 2918, 2366 ( $\nu_{\text{C}\equiv\text{N}}$ ), 884, 797  $\text{cm}^{-1}$ ;  $^1\text{H}$  NMR (500 MHz,  $\text{CDCl}_3$ ):  $\delta$ 2.14-2.20 (m, 2 H), 2.39 (t,  $J = 7$  Hz, 2 H), 3.29 (t,  $J = 7$  Hz, 2 H), 7.57-7.68 (m, 5 H), 7.83 (d,  $J = 8$  Hz, 1 H), 8.04 (d,  $J = 7.5$  Hz, 1 H), 8.65 (d,  $J = 8.5$  Hz, 1 H), 8.74 (d,  $J = 8$  Hz, 1 H);  $^{13}\text{C}$  NMR (125 MHz,  $\text{CDCl}_3$ ):  $\delta$ 16.8, 25.6, 32.0, 119.6, 122.5, 124.0, 124.4, 126.4, 126.5, 126.8, 127.0, 128.2, 129.2, 129.9, 130.6, 130.9, 131.5, 133.7; HRMS:  $\text{C}_{18}\text{H}_{15}\text{N}$  calculated 245.1204, found 245.1203.

**2,3-Dihydro-1*H*-cyclopenta[*b*]quinoline (3p’):** yellow oil; IR (KBr): 2926, 2242 ( $\nu_{\text{C}\equiv\text{N}}$ ), 782, 755  $\text{cm}^{-1}$ ;  $^1\text{H}$  NMR (500 MHz,  $\text{CDCl}_3$ ):  $\delta$ 2.09-2.18 (m, 2 H), 2.97 (t,  $J = 7.5$  Hz, 2 H), 3.28 (t,  $J = 7.5$  Hz, 2 H), 7.55 (q,  $J = 6.5$  Hz, 2 H), 7.61 (s, 1 H), 7.87 (q,  $J = 6$  Hz, 1 H), 8.01 (q,  $J = 6.5$  Hz, 1 H);  $^{13}\text{C}$  NMR (125 MHz,  $\text{CDCl}_3$ ):  $\delta$ 26.5, 31.6, 34.4, 127.1, 127.9, 128.5, 130.3, 132.3, 136.0, 138.7, 152.1, 167.2; HRMS:  $\text{C}_{12}\text{H}_{11}\text{N}$  calculated 169.0891, found 160.0890.
